# Supplementary material for: WDFY4 deficiency in NOD mice ameliorates autoimmune diabetes and insulitis
Source: PubMed Central journal article supplement — Proc Natl Acad Sci U S A. 2023 Mar 20;120(13):e2219956120. doi: 10.1073/pnas.2219956120 (PMC10068798; doi:10.1073/pnas.2219956120), 2023-03-20
Supplement: pnas.2219956120.sapp.pdf [file pnas.2219956120.sapp.pdf]

## Supporting Information for WDFY4 deficiency in NOD mice ameliorates autoimmune diabetes and insulinitis

Stephen T. Ferris<sup>1,2\*</sup>, Tiantian Liu<sup>1</sup>, Jing Chen<sup>1</sup>, Ray A. Ohara<sup>1</sup>, Feiya Ou<sup>1</sup>, Renee Wu<sup>1</sup>, Sunkyung Kim<sup>1</sup>,  
Theresa L. Murphy<sup>1</sup>, and Kenneth M. Murphy<sup>1\*</sup>

<sup>1</sup>Department of Pathology and Immunology, Washington University in St. Louis, School of Medicine, St. Louis, MO, 63110, USA;

<sup>2</sup>Current address: Department of Molecular Microbiology and Immunology, School of Medicine, Saint Louis University, St. Louis MO, 63104, USA

\*Lead Contact to whom correspondence should be addressed.

Phone: 314-263-2004, email: [kmurphy@wustl.edu](mailto:kmurphy@wustl.edu)

Phone: 314-977-8788, email: [stephen.ferris@health.slu.edu](mailto:stephen.ferris@health.slu.edu)

### This PDF file includes:

Figures S1 to S2

Supplementary Figure 1

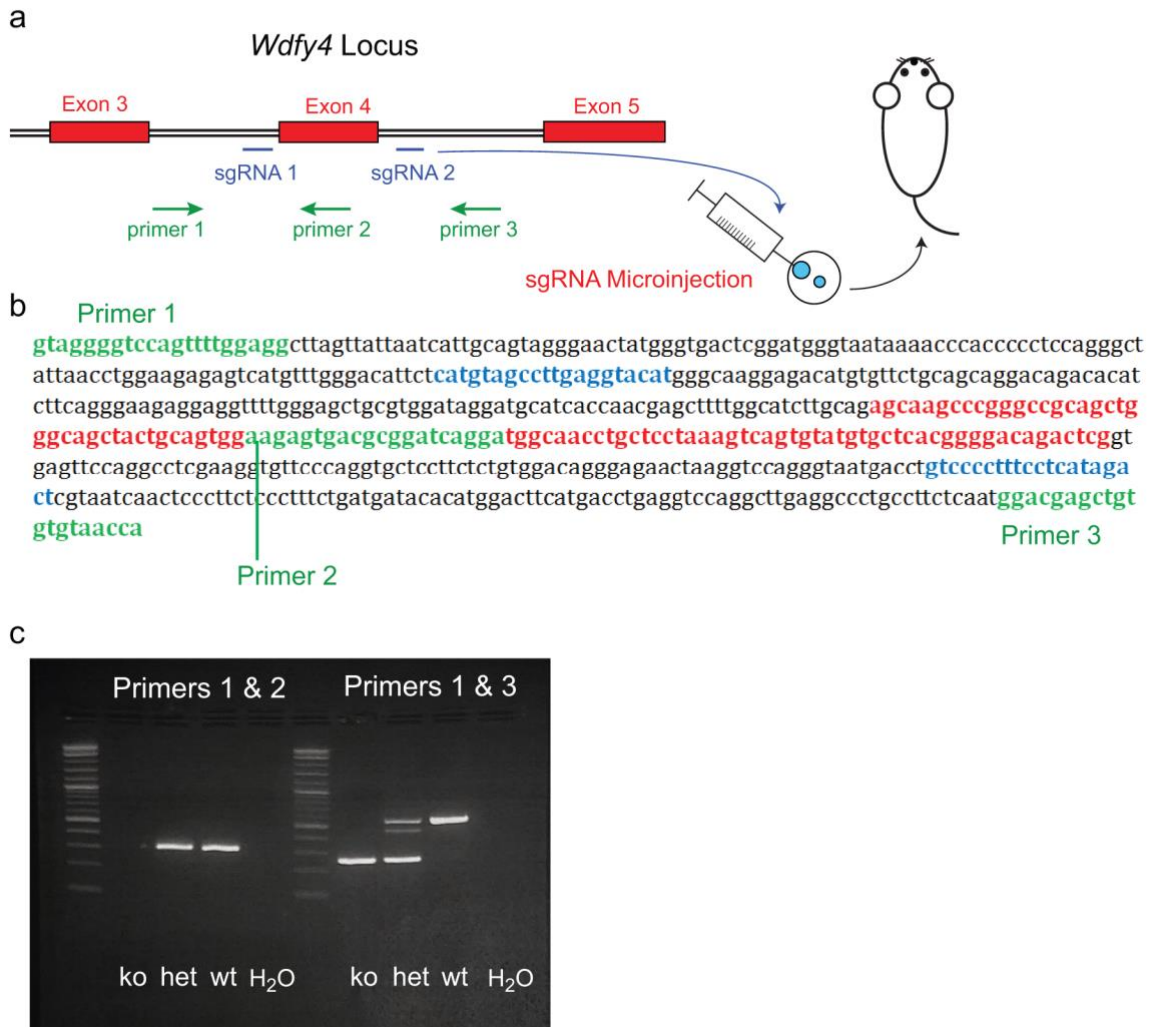

**Fig. S1.** Generation of NOD.*Wdfy4*<sup>-/-</sup> mice.

(a) Targeting design using CRISPR Cas9 to delete *Wdfy4* exon 4.

(b) Sequence showing sgRNAs, screening primers, and exons and introns for *Wdfy4* targeting design.

(c) Gel of genotyping for NOD.*Wdfy4*<sup>-/-</sup>, NOD.*Wdfy4*<sup>+/-</sup>, NOD.*Wdfy4*<sup>+/+</sup> mice

Supplementary Figure 2

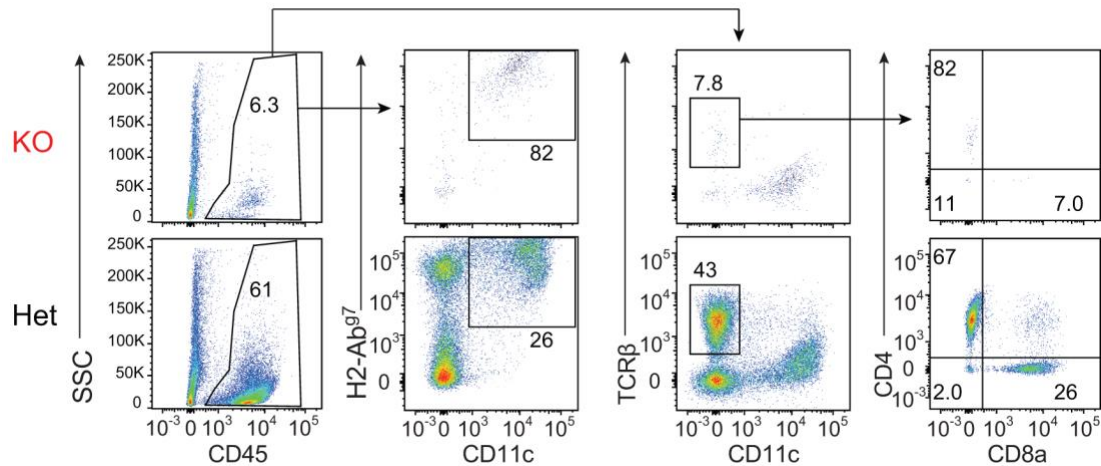

**Fig. S2.** Gating strategy for dispersed islets.

Representative flow plots from 12 week NOD. *Wdfy4*<sup>-/-</sup> (KO, top) and female NOD. *Wdfy4*<sup>+/-</sup> (Het, bottom).
